# Supplementary material
Source: PubMed Central journal article supplement (PMC2978583)

### Supplemental Figure Legend

Supplemental Figure 1. Effects of Akt inhibition on leptin signaling in HSC. As described in Figure 5, primary HSC were pretreated with Ad5dnAkt (or Ad5GFP) prior to treatment with leptin (100 ng/mL). RNA was isolated and changes in gene expression were evaluated by qRT-PCR. A) Myofibroblastic/mesenchymal markers:  $\alpha$ SMA, Col1 $\alpha$ 1, fibronectin (Fn1), S100A4, Vimentin (Vim), Desmin (Des), Msx2, WT1, and Snail, B) epithelial markers: (BMP7, Id2, desmoplakin (Dsp), E-cadherin (Cdh1) and markers of quiescent HSC: PPAR $\gamma$  and GFAP, and C) Hedgehog pathway genes: Shh, Gli1, Gli2, and sFRP1. Results are mean  $\pm$  SEM of triplicate experiments. \* $p$ <0.05, \*\* $p$ <0.01,  $\dagger p$ <0.005.

Supplemental Figure 1

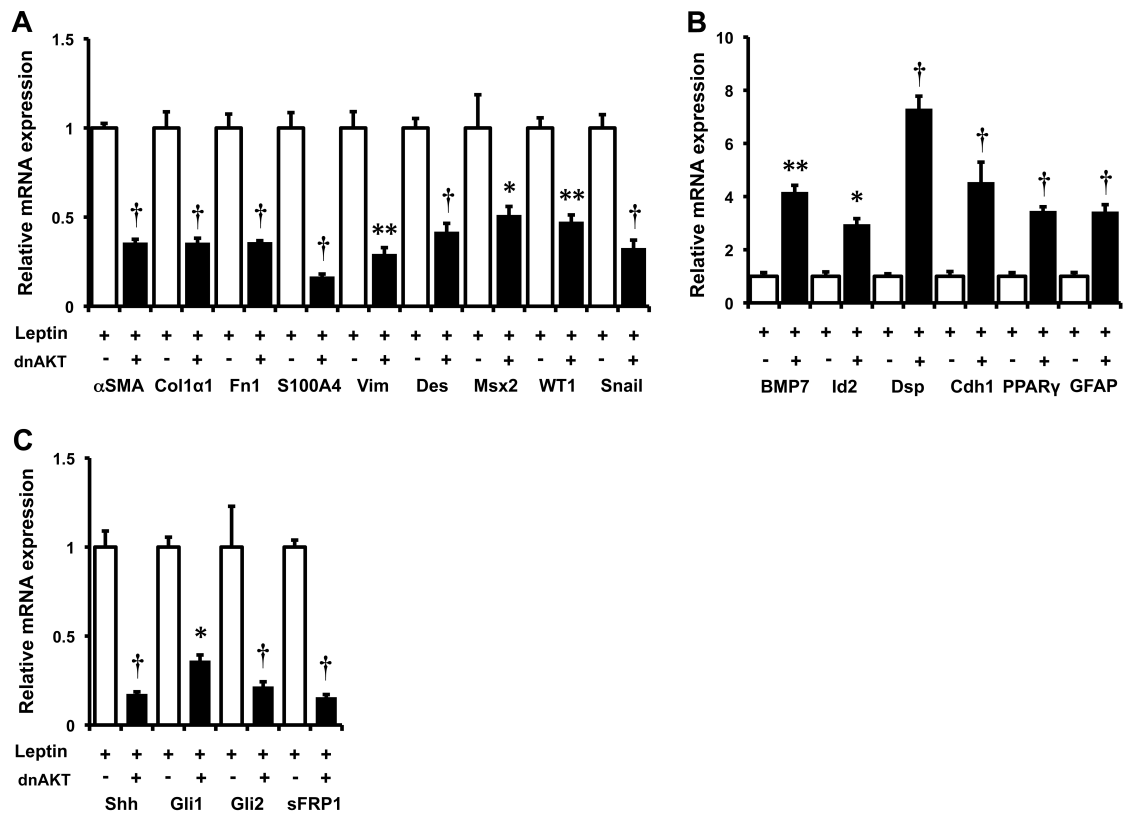

Supplement: supp_M110.168542_jbc.M110.168542-1.pdf [file supp_M110.168542_jbc.M110.168542-1.pdf]
